# Supplementary material
Source: publisher site journal article supplement (https://www.dovepress.com/get_supplementary_file.php?f=436549.docx)
Supplement: Supplementary file 1 [file get_supplementary_file.php]

**Supporting Information**

**Figure S1. The QQ plots of AUC(0-T), AUC(0-∞), MRT(0-t), MRT(0-∞), t1/2, Tmax, Vz/F, CLz/F and Cmax.**

*
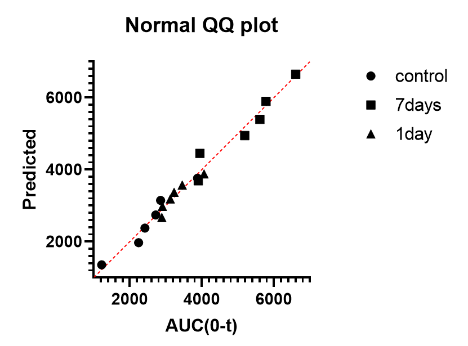

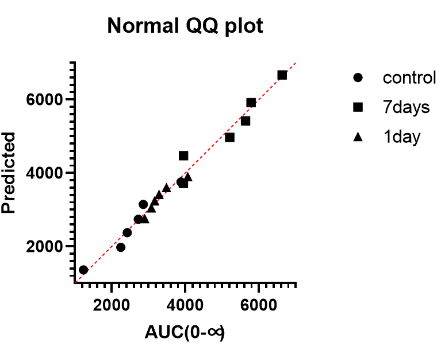
*
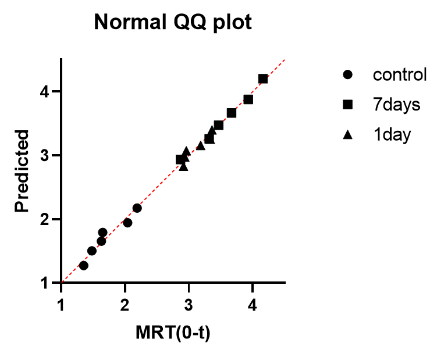


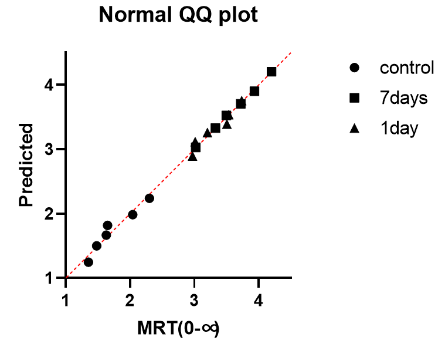

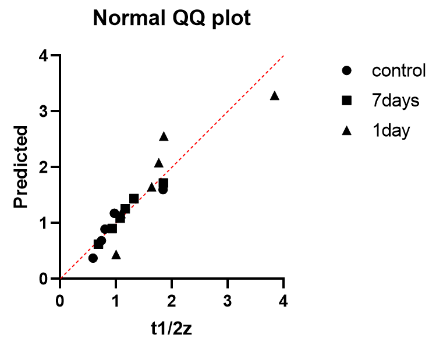

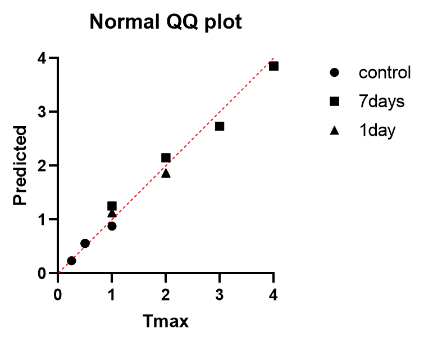


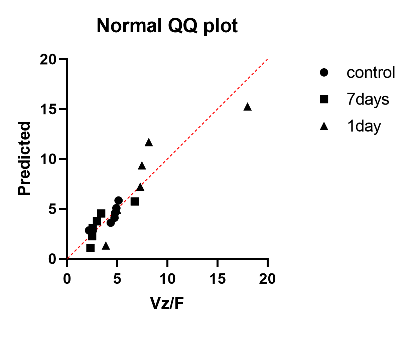

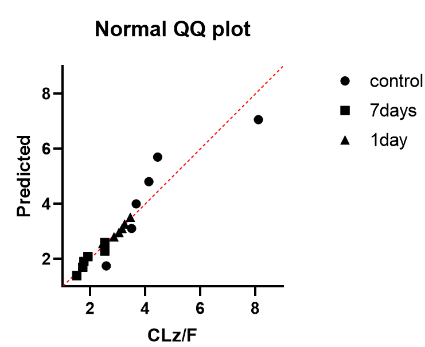

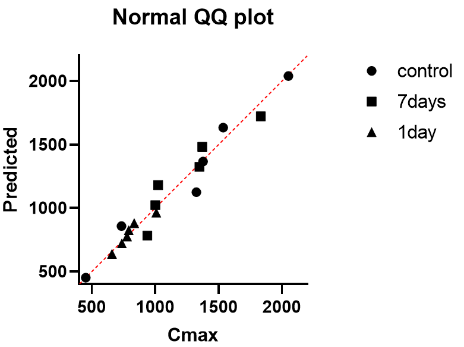


**Figure S2. The results of Hypothesis Test Summary and Independent-Samples Kruskal-Wallis Test of Tmax and Vz/F.**

| **Hypothesis Test Summary** | | | | |
| --- | --- | --- | --- | --- |
|  | **Null Hypothesis** | **Test** | **Sig.** | **Decision** |
| **1** | The distribution of Tmax is the same across categories of group. | Independent-Samples Kruskal-Wallis Test | .002 | Reject the null hypothesis. |
| **2** | The distribution of V is the same across categories of group. | Independent-Samples Kruskal-Wallis Test | .020 | Reject the null hypothesis. |
| Asymptotic significances are displayed. The significance level is .05. | | | | |


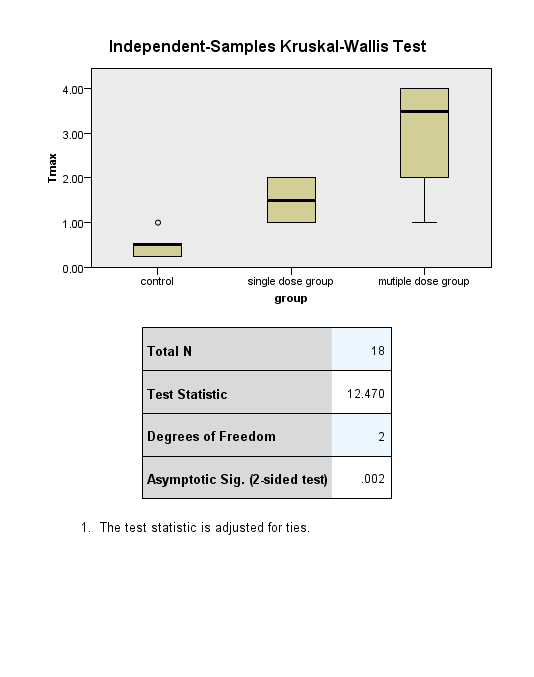

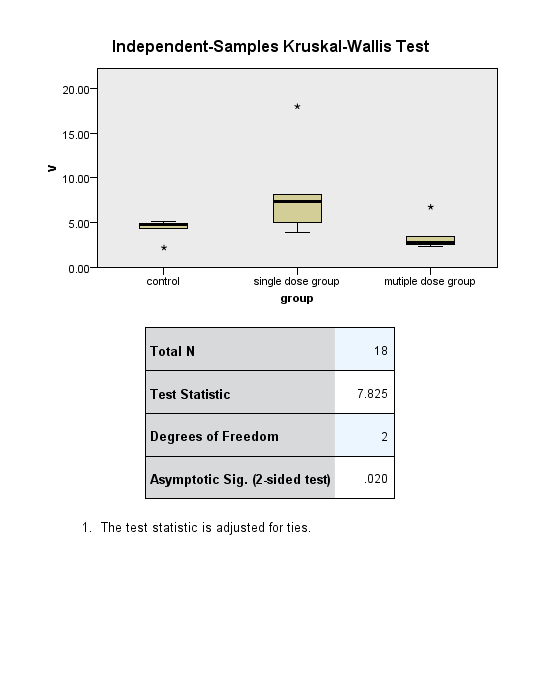


**Figure S3. The Continuous Field information of Tmax and Vz/F.**


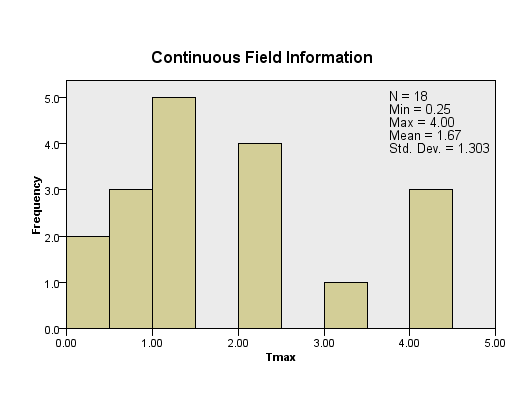

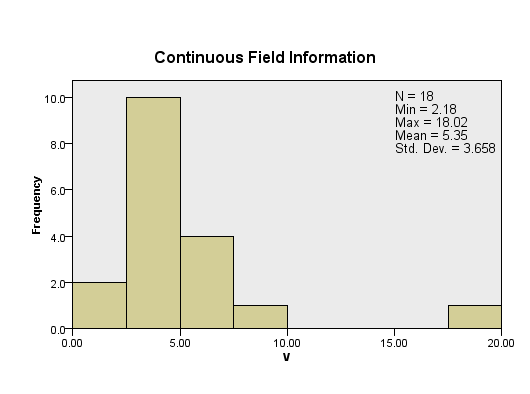


**Figure S4. The Kruskal-Wallis test results.** (A) TmaxPairwise Comparisons of group; (B) Vz/FPairwise Comparisons of group.


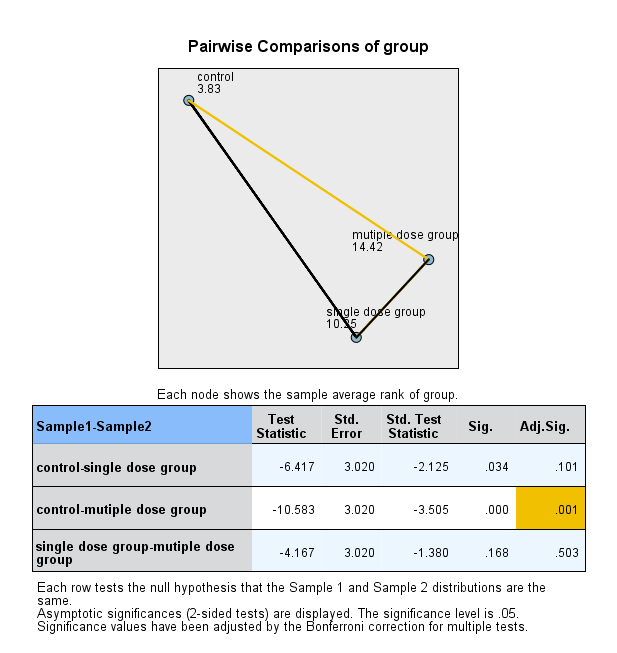

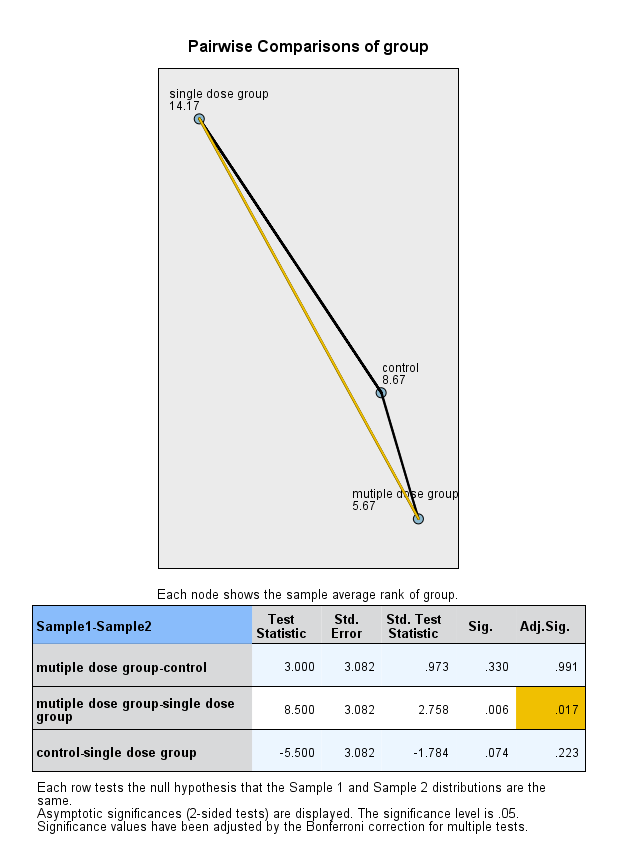


**B**

**A**
